# Supplementary material for: Interweaving Between Genetic and Epigenetic Studies on Childhood Asthma
Source: PubMed Central journal article supplement — Epigenet Insights. 2020 Jul 22;13:2516865720923395. doi: 10.1177/2516865720923395 (PMC7378715; doi:10.1177/2516865720923395), 2020-07-22
Supplement: Supplemental_Tables_xyz29536d7d85c79.pdf [file Supplemental_Tables_xyz29536d7d85c79.pdf]

Interweaving between genetic and epigenetic studies on asthma

Aniruddha Rathod<sup>1#</sup>, Jiasong Duan<sup>1#</sup>, Hongmei Zhang<sup>1\*</sup>, John W Holloway<sup>2,3</sup>, Susan Ewart<sup>5</sup>,

Hasan Arshad<sup>2,4</sup>, Wilfried Karmaus<sup>1</sup>

**1** Division of Epidemiology, Biostatistics, and Environmental Health Sciences, School of Public Health, University of Memphis, Memphis, TN, USA. **2** Clinical and Experimental Sciences, Faculty of Medicine, University of Southampton, Southampton, UK. **3** Human Development and Health, Faculty of Medicine, University of Southampton, Southampton, UK. **4** David Hide Asthma and Allergy Research Centre, Isle of Wight, UK. **5** College of Veterinary Medicine, Michigan State University, East Lansing, MI, USA.

# equal contribution

\*Corresponding author: [h Zhang6@memphis.edu](mailto:h Zhang6@memphis.edu)

Supplemental Table1. *Summary on the number of CpGs on each gene and their 0.5 MB neighboring SNPs, and the number of ANOVA models fitted for each gene, along with the*

*number of significant results after controlling FDR. To thoroughly examine whether IL4 and TLE4 have methQTLs, all available SNPs were assessed for their associations with DNAm.*

| <b>Gene</b>   | <b>Number of CpGs</b> | <b>Number of unique SNPs</b> | <b>Number of models</b> | <b>Number of significant results</b> |
|---------------|-----------------------|------------------------------|-------------------------|--------------------------------------|
| <i>DUSP22</i> | 24                    | 2,432                        | 53,964                  | 47                                   |
| <i>IKZF3</i>  | 7                     | 3,119                        | 18,512                  | 26                                   |
| <i>IL4</i>    | 4                     | 1,531                        | 6,116                   | 0                                    |
| <i>RUNX1</i>  | 7                     | 3,992                        | 96,723                  | 17                                   |
| <i>TLE4</i>   | 37                    | 1,947                        | 13,575                  | 0                                    |

**Supplemental Table2.** *Summary on the number of CpGs on each gene and their 2 MB neighboring SNPs, and the number of ANOVA models fitted for each gene, along with the number of significant results after controlling FDR. To thoroughly examine whether IL4 and TLE4 have methQTLs, all available SNPs were assessed for their associations with DNAm.*

| <b>Gene</b>   | <b>Number of CpGs</b> | <b>Number of unique SNPs</b> | <b>Number of models</b> | <b>Number of significant results</b> |
|---------------|-----------------------|------------------------------|-------------------------|--------------------------------------|
| <i>DUSP22</i> | 24                    | 7,879                        | 184,555                 | 177                                  |
| <i>IKZF3</i>  | 7                     | 10,658                       | 70,659                  | 23                                   |
| <i>IL4</i>    | 4                     | 5,859                        | 23,398                  | 0                                    |
| <i>RUNX1</i>  | 7                     | 11,127                       | 366,444                 | 23                                   |
| <i>TLE4</i>   | 37                    | 7,368                        | 51,512                  | 0                                    |
